# Supplementary material for: Marine Collagen-Based Bioink for 3D Bioprinting of a Bilayered Skin Model
Source: MDPI journal article supplement (doi:10.3390/pharmaceutics15051331), 2023-04-24
Supplement: s1 [file s1]

## Supplementary Materials

**Table S1.** Primer sequence of the analyzed gene.

| <i>GENES</i>        | <i>PRIMER SEQUENCE</i>         |
|---------------------|--------------------------------|
| <i>β-Actin</i>      | F-TCTGGCACCACACCT              |
| <i>β-Actin</i>      | R-TGATCTGGGTCATCT              |
| <i>Collagen I</i>   | F-GGGAACGCGTGTCAATCC           |
| <i>Collagen I</i>   | R-CAGTTACACAAGGAACAGAACAGTCTCT |
| <i>Collagen III</i> | F-TGGTCAGTCCTATGCGGATAGA       |
| <i>Collagen III</i> | R-CGGATCCTGAGTCACAGACACA       |
| <i>Fibronectin</i>  | F-TCGCCATCAGTAGAAGGTAGCA       |
| <i>Fibronectin</i>  | R-TGTTATACTGAACACCAGGTTGCAA    |
| <i>Elastin</i>      | F-CTAAATACGGTGCTGCTGGC         |
| <i>Elastin</i>      | R-CATGGGATGGGGTTACAAAG         |
| <i>K6a</i>          | F-GGCTGAGGAGCGGCGTGAACAG       |
| <i>K6a</i>          | R-AAGGAGGCCAAACTTGTTGTTGAG     |
